# Supplementary material
Source: PubMed Central journal article supplement (PMC4542269)
Supplement: supp_dc15-0302v150302_DC150302SupplementaryData.pdf [file supp_dc15-0302v150302_DC150302SupplementaryData.pdf]

SUPPLEMENTARY DATA

**Supplementary Table S1.** Sensitivity analysis restricted to women who never reported regular anti-depressant use or self-reported clinician diagnosis <sup>a</sup> (*N*= 44,029). Odds Ratios for prevalent type 2 diabetes in the Nurses' Health Study II by chronotype. CI: confidence interval. Total sample size (*N*) and number of cases within each sample are indicated in the table.

| <b>Prevalence Analysis: Odds Ratios (95% CI), follow-up period 2005-2011</b> |                                                                      |                                                               |                                                             |
|------------------------------------------------------------------------------|----------------------------------------------------------------------|---------------------------------------------------------------|-------------------------------------------------------------|
|                                                                              | Intermediate Chronotypes<br>( <i>N</i> = 23,084, <i>cases</i> = 435) | Early Chronotypes<br>( <i>N</i> = 16,674, <i>cases</i> = 250) | Late Chronotypes<br>( <i>N</i> = 4,271, <i>cases</i> = 111) |
| Model 1 <sup>b</sup>                                                         | 1.00                                                                 | 0.76 (0.65 – 0.89)                                            | 1.39 (1.13 – 1.72)                                          |
| Model 2 <sup>c</sup>                                                         | 1.00                                                                 | 0.81 (0.69 – 0.95)                                            | 1.21 (0.98 – 1.50)                                          |
| Model 3 <sup>d</sup>                                                         | 1.00                                                                 | 0.85 (0.72 – 1.00)                                            | 1.10 (0.89 – 1.37)                                          |

<sup>a</sup> Regular antidepressant medication use was assessed in 1993, 1997, 2001, 2003 and 2005; self-reported clinical diagnosis was assessed in 2003 and 2005.

<sup>b</sup> Age-adjusted model.

<sup>c</sup> Additionally adjusted for family history of diabetes (yes/no), smoking status (past, current 1-14 cig/day, 15+ cig/day), alcohol intake (0g/day, 0.1 – 5g/day, 5.1 – 10g/day, 10.1 – 15g/day, > 15g/day), physical activity (quintiles of MET-hours/week), diet score (quintiles, AHEI, assessed in 2007), oral contraceptive use (ever, never), menopausal status (pre, post), postmenopausal hormone use (pre, ever, never), median annual household income (in tertiles), and self-reported sleep duration (assessed in 2009, < 5h, 6h, 7h, 8h, > 9h).

<sup>d</sup> Additionally adjusted for and body mass index (<25, 25-30, 30-35, >35).

SUPPLEMENTARY DATA

**Supplementary Table S2.** Sensitivity analysis restricted to women who never reported regular anti-depressant use or self-reported clinician diagnosis<sup>a</sup> (*N*= 44,029), odds ratios for prevalent type 2 diabetes in the Nurses' Health Study II by chronotype and cumulative rotating night shift work exposure. The interaction between chronotype and shift work exposure is significant (*P*=0.002)<sup>b</sup>. CI: confidence interval. Total sample size (*N*) and number of cases within each sample are indicated in the table.

| <b>Prevalence Analysis: Odds Ratios (95% CI), follow-up period 2005-2011</b> |                                      |                                                    |                                                  |
|------------------------------------------------------------------------------|--------------------------------------|----------------------------------------------------|--------------------------------------------------|
|                                                                              | Intermediate Chronotypes             | Early Chronotypes                                  | Late Chronotypes                                 |
| No rotating night shift work <sup>c</sup>                                    | 1.00<br><i>N</i> = 6,852, 96 cases   | 0.80 (0.57 – 1.13)<br><i>N</i> = 5,033, 56 cases   | 1.97 (1.31 – 2.96)<br><i>N</i> = 1,133, 35 cases |
| <10 years <sup>c</sup>                                                       | 1.00<br><i>N</i> = 14,382, 287 cases | 0.82 (0.67 – 1.00)<br><i>N</i> = 10,359, 156 cases | 0.91 (0.68 – 1.21)<br><i>N</i> = 2,650, 61 cases |
| ≥ 10 years <sup>c</sup>                                                      | 1.00<br><i>N</i> = 1,850, 52 cases   | 1.18 (0.75 – 1.85)<br><i>N</i> = 1,282, 38 cases   | 0.95 (0.51 – 1.76)<br><i>N</i> = 488, 15 cases   |

<sup>a</sup> Regular antidepressant medication use was assessed in 1993, 1997, 2001, 2003 and 2005; self-reported clinical diagnosis was assessed in 2003-2009).

<sup>b</sup> Significance of evaluated by the likelihood ratio test.

<sup>c</sup> Models adjusted for age, family history of diabetes (yes/no), smoking status (past, current 1-14 cig/day, 15+ cig/day), alcohol intake (0g/day, 0.1 – 5g/day, 5.1 – 10g/day, 10.1 – 15g/day, > 15g/day), oral contraceptive use (ever/never), menopausal status (pre/post), postmenopausal hormone use (pre, ever, never), physical activity (quintiles of MET-hours/week), diet score (quintiles, AHEI, assessed in 2007), and self-reported sleep duration (assessed in 2009, < 5h, 6h, 7h, 8h, > 9h), median annual household income (in tertiles), and body mass index (<25, 25-30, 30-35, >35).

SUPPLEMENTARY DATA

**Supplementary Table S3.** Sensitivity analysis restricted to women who never reported permanent night shift work (A, N= 50,389, retrospective lifetime assessment in 2009) or restricting to women who did not report permanent night shift work in 2009 (B, n= 63,830, in 2009). Odds ratios for prevalent type 2 diabetes in the Nurses' Health Study II by chronotype and cumulative rotating night shift work exposure. The interaction between chronotype and shift work exposure is significant in both analyses<sup>a</sup>. CI: 95% confidence interval. Total sample size (n) and number of cases within each sample are indicated in the table.

| <b>A. Prevalence Analysis: Odds Ratios (95% CI) restricting to women who <u>never</u> reported permanent night shift work</b>  |                                    |                                                  |                                                 |
|--------------------------------------------------------------------------------------------------------------------------------|------------------------------------|--------------------------------------------------|-------------------------------------------------|
|                                                                                                                                | Intermediate Chronotypes           | Early Chronotypes                                | Late Chronotypes                                |
| No rotating night shift work <sup>b</sup>                                                                                      | 1.00<br><i>N=8,544, 164 cases</i>  | 0.76 (0.58 – 1.00)<br><i>N=5,925, 81 cases</i>   | 1.38 (0.98– 1.96)<br><i>N=1,366, 45 cases</i>   |
| < 10 years <sup>b</sup>                                                                                                        | 1.00<br><i>N=16,963, 377 cases</i> | 0.89 (0.75 – 1.06)<br><i>N=11,700, 205 cases</i> | 0.95 (0.74 – 1.22)<br><i>N=2,945, 81 cases</i>  |
| ≥10 years <sup>b</sup>                                                                                                         | 1.00<br><i>N=1,544, 54 cases</i>   | 1.05 (0.65 – 1.69)<br><i>N=1,108, 34 cases</i>   | 0.67 (0.33 – 1.37)<br><i>N=294, 11 cases</i>    |
| <b>B. Prevalence Analysis: Odds Ratios (95% CI) restricting to women who did not report permanent night shift work in 2009</b> |                                    |                                                  |                                                 |
| No rotating night shift work <sup>b</sup>                                                                                      | 1.00<br><i>N=10,090, 197 cases</i> | 0.81 (0.63 – 1.05)<br><i>N=6,756, 99 cases</i>   | 1.55 (1.16 – 2.08)<br><i>N=1,812, 68 cases</i>  |
| < 10 years <sup>b</sup>                                                                                                        | 1.00<br><i>N=21,557, 517 cases</i> | 0.85 (0.73 – 0.99)<br><i>N=14,165, 255 cases</i> | 0.92 (0.76 – 1.13)<br><i>N=4,424, 131 cases</i> |
| ≥10 years <sup>b</sup>                                                                                                         | 1.00<br><i>N=2,624, 94 cases</i>   | 1.17 (0.83 – 1.67)<br><i>N=1,665, 59 cases</i>   | 0.77 (0.49 – 1.22)<br><i>N=737, 27 cases</i>    |

<sup>a</sup>Significance of evaluated by the likelihood ratio test.

<sup>b</sup> Models adjusted for age, family history of diabetes (yes/no), smoking status (past, current 1-14 cig/day, 15+ cig/day), alcohol intake (0g/day, 0.1 – 5g/day, 5.1 – 10g/day, 10.1 – 15g/day, > 15g/day), oral contraceptive use (ever/never), menopausal status (pre/post), postmenopausal hormone use (pre, ever, never), physical activity (quintiles of MET-hours/week), diet score (quintiles, AHEI, assessed in 2007), and self-reported sleep duration (assessed in 2009, < 5h, 6h, 7h, 8h, > 9h), median annual household income (in tertiles), and body mass index (<25, 25-30, 30-35, >35).
